# Supplementary material for: Transcriptomic Analysis of Papillary Thyroid Cancer: A Focus on Immune-Subtyping, Oncogenic Fusion, and Recurrence
Source: PubMed Central journal article supplement — Clin Exp Otorhinolaryngol. 2022 Mar 4;15(2):183–93. doi: 10.21053/ceo.2021.02215 (PMC9149236; doi:10.21053/ceo.2021.02215), 2022-03-04
Supplement: ceo-2021-02215-suppl1.pdf [file ceo-2021-02215-suppl1.pdf]

**Supplementary Table 1.** Clinical characteristics of Korean papillary thyroid cancer patients

| Variable                         | Value       |
|----------------------------------|-------------|
| Number of patients               | 282         |
| Age (yr)                         | 49 ± 15.5   |
| Female sex                       | 206 (73.0)  |
| Tumor size (cm)                  | 1.83 ± 1.79 |
| Extracapsular invasion           |             |
| Yes                              | 40 (14.2)   |
| No                               | 242 (85.8)  |
| Extrathyroidal extension         |             |
| Yes                              | 124 (44.0)  |
| No                               | 158 (56.0)  |
| Central lymph node metastasis    |             |
| Yes                              | 151 (53.5)  |
| No                               | 131 (46.5)  |
| Lateral lymph node metastasis    |             |
| Yes                              | 118 (41.8)  |
| No                               | 164 (58.2)  |
| Lymphovascular invasion          |             |
| Yes                              | 231 (81.9)  |
| No                               | 51 (18.1)   |
| Recurrence or persistent disease |             |
| Yes                              | 40 (14.2)   |
| No                               | 242 (85.8)  |

Values are presented as mean ± standard deviation or number (%).
