# Supplementary material for: Transcriptomic Analysis of Papillary Thyroid Cancer: A Focus on Immune-Subtyping, Oncogenic Fusion, and Recurrence
Source: PubMed Central journal article supplement — Clin Exp Otorhinolaryngol. 2022 Mar 4;15(2):183–93. doi: 10.21053/ceo.2021.02215 (PMC9149236; doi:10.21053/ceo.2021.02215), 2022-03-04
Supplement: ceo-2021-02215-suppl2.pdf [file ceo-2021-02215-suppl2.pdf]

**Supplementary Table 2.** Associations between clinical characteristics and immune subtypes

| Variable                         | Number of patients | Immune subgroup |                      |              | P-value |
|----------------------------------|--------------------|-----------------|----------------------|--------------|---------|
|                                  |                    | Hot (n=35)      | Intermediate (n=107) | Cold (n=140) |         |
| Tumor size (cm)                  |                    | 2.42±1.8        | 2.01±2.1             | 1.55±1.4     | 0.020*  |
| Sex                              |                    |                 |                      |              | 0.053   |
| Female                           | 206                | 22 (62.9)       | 73 (68.2)            | 111 (79.3)   |         |
| Male                             | 76                 | 13 (37.1)       | 34 (31.8)            | 29 (20.7)    |         |
| ECl                              |                    |                 |                      |              | 0.099   |
| Yes                              | 147                | 16 (45.7)       | 49 (45.8)            | 82 (58.6)    |         |
| No                               | 135                | 19 (54.3)       | 58 (54.2)            | 58 (41.4)    |         |
| ETE                              |                    |                 |                      |              | <0.001* |
| Yes                              | 124                | 22 (62.9)       | 61 (57.0)            | 41 (29.3)    |         |
| No                               | 158                | 13 (37.1)       | 46 (43.0)            | 99 (70.7)    |         |
| C_LNM                            |                    |                 |                      |              | <0.001* |
| Yes                              | 151                | 26 (74.3)       | 75 (70.1)            | 50 (35.7)    |         |
| No                               | 131                | 9 (25.7)        | 32 (29.9)            | 90 (64.3)    |         |
| L_LNM                            |                    |                 |                      |              | <0.001* |
| Yes                              | 118                | 24 (68.6)       | 52 (48.6)            | 42 (30.0)    |         |
| No                               | 164                | 11 (31.4)       | 55 (51.4)            | 98 (70.0)    |         |
| LVI                              |                    |                 |                      |              | 0.501   |
| Yes                              | 231                | 29 (82.9)       | 91 (85.0)            | 111 (79.3)   |         |
| No                               | 51                 | 6 (17.1)        | 16 (15.0)            | 29 (29.7)    |         |
| Recurrence or persistent disease |                    |                 |                      |              | 0.267   |
| Yes                              | 40                 | 8 (22.9)        | 15 (14.0)            | 17 (12.1)    |         |
| No                               | 242                | 27 (77.1)       | 92 (86.0)            | 123 (87.9)   |         |

Values are presented as mean ± standard deviation or number (%). All statistical tests were performed using the Fisher exact test.

ECl, extracapsular invasion; ETE, extrathyroidal extension; C\_LNM, central lymph node metastasis; L\_LNM, lateral lymph node metastasis; LVI, lymphovascular invasion.

\*Indicates significance with  $P < 0.05$ .
