# Supplementary material for: Transcriptomic Analysis of Papillary Thyroid Cancer: A Focus on Immune-Subtyping, Oncogenic Fusion, and Recurrence
Source: PubMed Central journal article supplement — Clin Exp Otorhinolaryngol. 2022 Mar 4;15(2):183–93. doi: 10.21053/ceo.2021.02215 (PMC9149236; doi:10.21053/ceo.2021.02215), 2022-03-04
Supplement: ceo-2021-02215-suppl4.pdf [file ceo-2021-02215-suppl4.pdf]

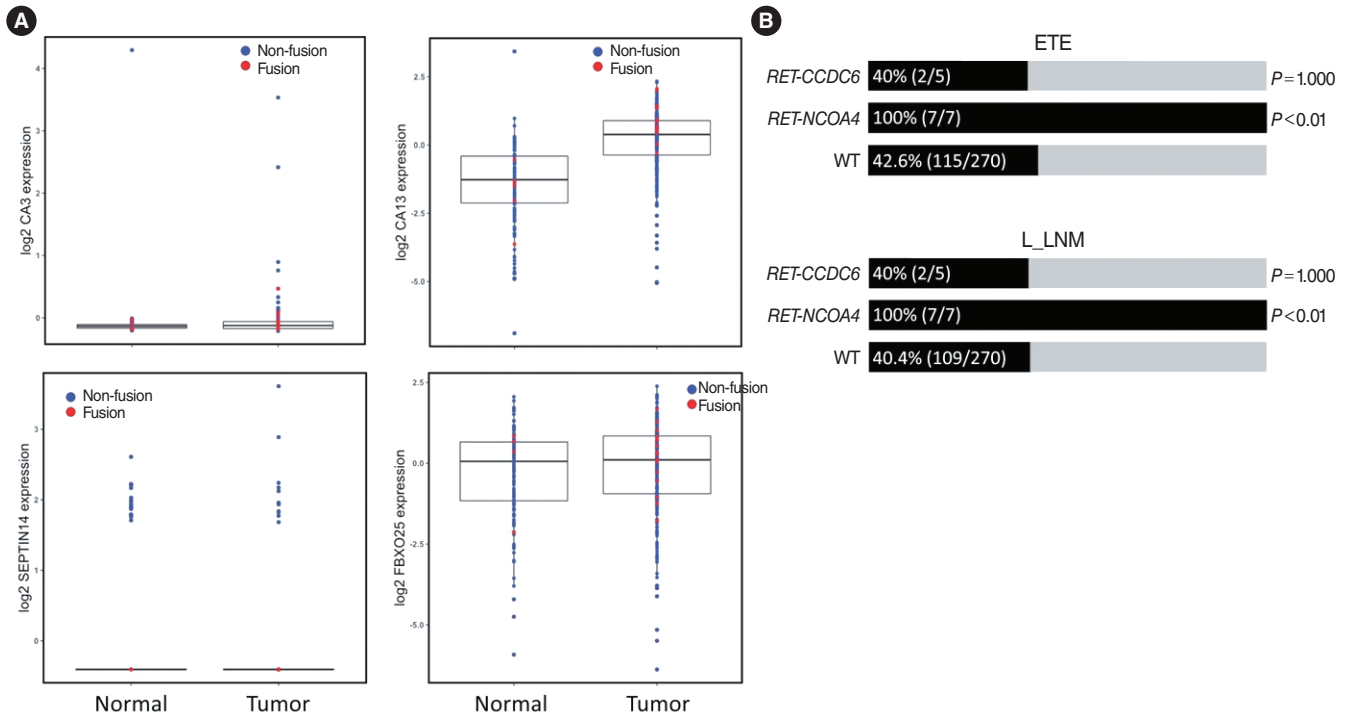

Supplementary Fig. 2. (A) Expression patterns of non-driver fusion. Boxplots showing non-driver oncogenic fusions, such as *CA13* and *FBXO25*. (B) The ratio of extrathyroidal extension (ETE) and lateral lymph node metastasis (L\_LNM) according to the partner gene of *RET* fusion compared to normal samples. WT, wildtype.
