# Supplementary material for: Transcriptomic Analysis of Papillary Thyroid Cancer: A Focus on Immune-Subtyping, Oncogenic Fusion, and Recurrence
Source: PubMed Central journal article supplement — Clin Exp Otorhinolaryngol. 2022 Mar 4;15(2):183–93. doi: 10.21053/ceo.2021.02215 (PMC9149236; doi:10.21053/ceo.2021.02215), 2022-03-04
Supplement: ceo-2021-02215-suppl5.pdf [file ceo-2021-02215-suppl5.pdf]

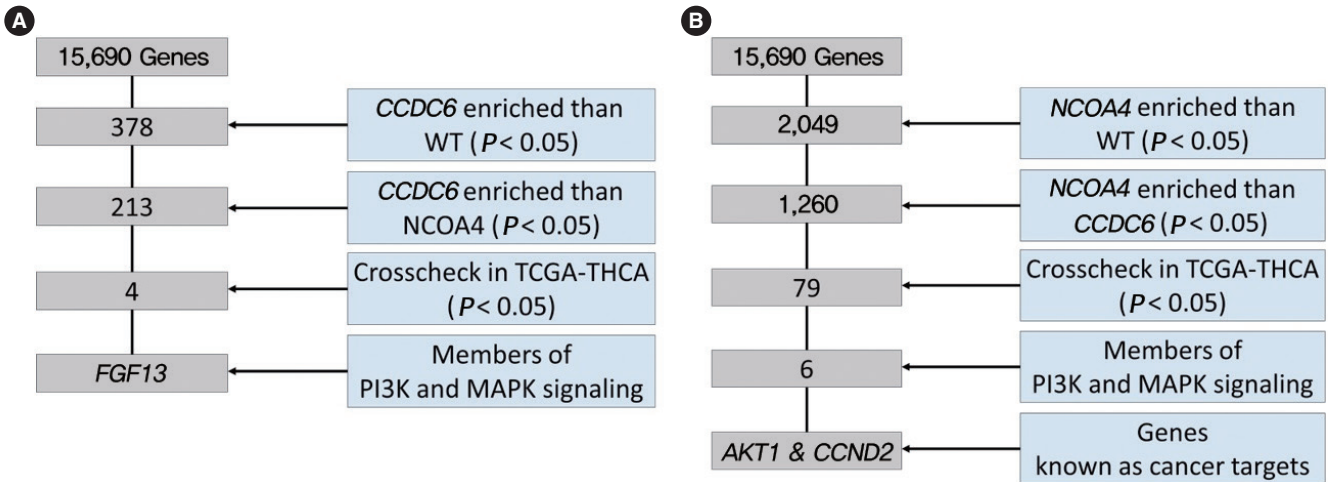

Supplementary Fig. 3. Differently regulated genes in PI3K and mitogen-activated protein kinase (MAPK) signaling according to the partner genes in the fusion analysis. We found *RET-CCDC6*-specific expression of *FGF13* (A) and *RET-NCOA4*-specific expression of *AKT1* and *CCND2* (B). WT, wildtype.
