# Supplementary material for: Transcriptomic Analysis of Papillary Thyroid Cancer: A Focus on Immune-Subtyping, Oncogenic Fusion, and Recurrence
Source: PubMed Central journal article supplement — Clin Exp Otorhinolaryngol. 2022 Mar 4;15(2):183–93. doi: 10.21053/ceo.2021.02215 (PMC9149236; doi:10.21053/ceo.2021.02215), 2022-03-04
Supplement: ceo-2021-02215-suppl6.pdf [file ceo-2021-02215-suppl6.pdf]

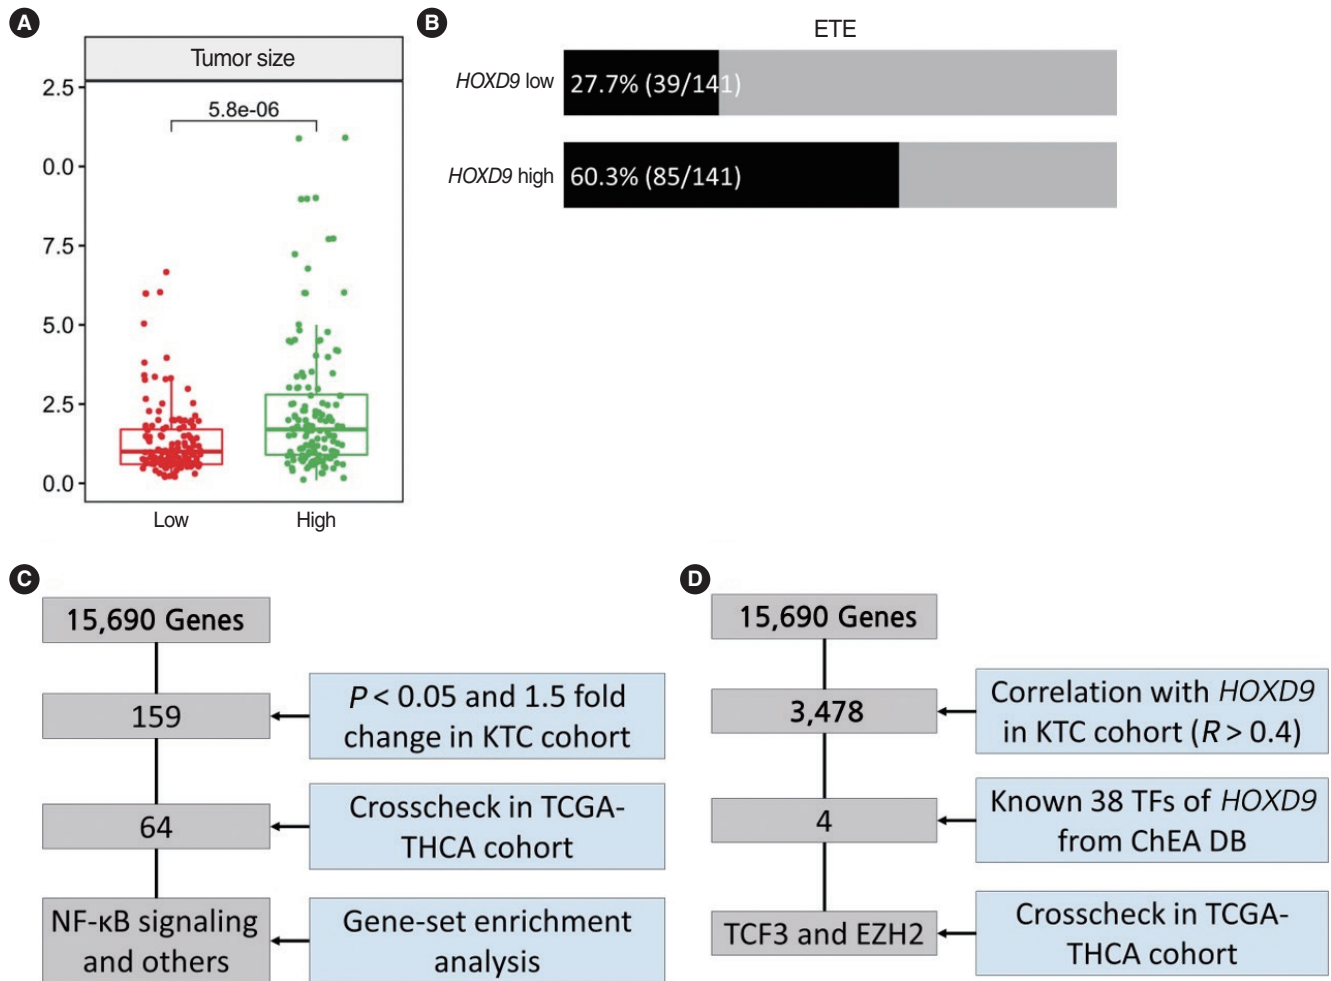

Supplementary Fig. 4. Characteristics of the *HOXD9* high group. (A, B) Associations between *HOXD9* and clinical factors, including tumor size and extrathyroidal extension (ETE). (C) Nuclear factor kappa-light-chain-enhancer of activated B cells (NF- $\kappa$ B) signaling from gene set enrichment analysis in the *HOXD9*-high group. (D) Transcription factors such as transcription factor 3 (TCF3) and enhancer of zeste 2 polycomb repressive complex 2 subunit (EZH2) regulate the expression of *HOXD9* as binding promoter regions of *HOXD9*. KTC, Korean Thyroid Cancer; TCGA-THCA, the Thyroid Carcinoma cohort from the Cancer Genome Atlas.
